# 1 **Retinal self-organization: a model of RGC and SAC mosaic formation**

## 2 **Short title: Computational model of retinal mosaic formation**

3 Jean de Montigny<sup>1\*</sup>, Evelyne Sernagor<sup>1</sup> and Roman Bauer<sup>2</sup>

## 4 **Affiliations**

5 <sup>1</sup> Biosciences Institute, Newcastle University, Newcastle upon Tyne, United Kingdom,

6 <sup>2</sup> Department of Computer Science, University of Surrey, United Kingdom,

7 \* Corresponding author

8 E-mail: Jean.de-Montigny@newcastle.ac.uk

## 9 **Abstract**

10 Individual retinal cell types exhibit semi-regular spatial patterns called retinal mosaics. These  
11 mosaics enable uniform sampling of visual information and are formed to varying degrees across  
12 cell types. Retinal ganglion cells (RGC) and amacrine cells (including starburst amacrine cells  
13 (SAC)) are notably known to exhibit such layouts. Mechanisms responsible for the formation of  
14 such organised structures and their requirements are still not well understood. Mosaic formation  
15 follows three main principles: (1) homotypic cells prevent nearby cells from adopting the same  
16 type, (2) cell tangential migration, with homotypic cell repulsion, (3) cell death (with RGCs  
17 exhibiting high rates of apoptosis).

18 Here, we use BioDynaMo, an agent-based simulation framework, to build a detailed and  
19 mechanistic model of mosaic formation. In particular, we investigate the implications of the three  
20 theories for RGC's mosaic formation. We report that the cell migration mechanism yields the most  
21 regular mosaics and that cell death can create regular mosaics only if the death rate is kept below  
22 30%, after which cell death has a negative impact on mosaic regularity. In addition, and in  
23 accordance with recent studies, we propose here that low density RGC type mosaics exhibit on

24 average low regularities, and thus we question the relevance of regular spacing as a criterion for a  
25 group of RGCs to form a RGC type.

26 We also investigate SAC mosaics formation and possible interactions between the ganglion cell  
27 layer (GCL) and inner nuclear layer (INL) populations. Investigations are conducted both  
28 experimentally and by applying our simulation model to the SAC population. We report that  
29 homotypic interactions between the GCL and INL populations during mosaics creation are required  
30 to reproduce the observed SAC mosaics' characteristics. This suggests that the GCL and INL  
31 populations of SACs might not be independent during retinal development.

## 32 **Author Summary**

33 Retinal function depends on cells self-organisation during early development. Understanding the  
34 mechanisms underlying this self-organisation could improve not only our comprehension of the  
35 retina and its development but also of the cortex. Ultimately, this could lead to novel therapeutic  
36 approaches for developmental diseases. Computational models can be of precious help to study this  
37 process of self-organisation, given that they are biologically plausible. In this sense, it is important  
38 that implemented developmental mechanisms follow the principle of locally available information,  
39 without any global knowledge or external supervisor. Here, we follow this principle to investigate  
40 mosaic formation during retinal development. In this work, we demonstrate that tangential  
41 migration is the only mechanism able to form regular mosaics and that the GCL/INL SAC  
42 populations might not be independent during their mosaic formation. More, we question the  
43 relevance of regular spacing for RGC types classification.

## 44 **Introduction**

45 The mammalian retina is composed of six main types of neuronal cells (cones, rods, horizontal,  
46 bipolar, amacrine and ganglion cells), subdivided into many different anatomical and functional  
47 subtypes, forming a complexly organised structure. Notably, individual cell types exhibit semi-

48 regular spatial patterns called retinal mosaics. Regular spacing between homotypic cells enable  
49 homogeneous processing of the light signals, leaving no perceptual holes within our visual field. In  
50 particular, sub-groups of retinal ganglion cells (RGCs) and star burst amacrine cells (SACs) are  
51 known to form regular mosaics and both cell types are widely used to study mosaic organization.  
52 SACs are divided into two populations, one located in the inner nuclear layer (INL), and the other  
53 in the ganglion cell layer (GCL). Each population forms an independent mosaic.

54 RGCs are located in the GCL and are the output cells of the retina, sending all visual information  
55 processed in the retina to the brain visual areas. There are many ways RGCs can be classified into  
56 subgroups. One simple, basic approach is to classify them into three functional and morphological  
57 groups depending on the sub-layer their dendrites laminate into in the inner plexiform layer (IPL),  
58 forming the On, Off and On-Off groups. On cells respond to increase of light while Off cells  
59 respond to a decrease of light and On-Off cells respond to both increase and decrease of light.

60 RGCs can however be divided into more than 40 types (1–3), each having different functional and  
61 anatomical characteristics. Their density is also known to greatly differ, varying from less than 50  
62 cells/mm<sup>2</sup> to more than 300 cells/mm<sup>2</sup> (3). It has been proposed that a group of RGCs has to fulfil  
63 four criteria in order to be considered a RGC type (3): 1. Morphological homogeneity (dendritic tree  
64 shape). 2. Identical physiological properties (electrophysiological response to light). 3. Similar gene  
65 expression (molecular signature). 4. Regular spacing (mosaic). Thus, being organised in mosaics  
66 could represent an important feature of each RGC type. Even if the total number of RGC types is  
67 estimated to more than 40, only 19 have been fully characterised (cellular density, morphology,  
68 molecular signature and functions) (3). Other RGC types have been only partially characterised.

69 RGCs are the first cell class to differentiate in the immature retina, generated in the ventricular  
70 zone, followed by migration to the GCL, where they start extending dendrites towards the IPL.  
71 RGCs are the only cell class notably more numerous in the immature retina than in the adult retina.  
72 Indeed, around 60% of newly born RGCs undergo programmed cell death (apoptosis) during the

73 perinatal period (4). Interestingly, not much is known yet about the impact of RGC apoptosis on the  
74 maturation of retinal circuitry and visual pathways.

75 Despite being an important feature of retinal organization, retinal mosaic' formation is not fully  
76 understood yet. In particular, three mechanisms are believed to potentially take part in their  
77 development: cell-fate determination (CF), programmed cell death (CD) and tangential cellular  
78 migration (CM) (2,5).

#### 79 Cell fate determination

80 CF is a process by which a cell of a certain type will prevent the emergence of same type cells in its  
81 immediate vicinity (6). After passing through an intrinsically determined state, retinal progenitors  
82 are still left in an undifferentiated state, but are now only capable of giving rise to a limited subset  
83 of cell types. The precise type the cells choose to differentiate into depends on extrinsic signals (7).  
84 These extrinsic signals can consist of chemical cues such as trans-membrane proteins (8–10) and  
85 may be delivered by an already differentiated retinal cell in order to block neighbouring  
86 undifferentiated cells from differentiating into the same cell type. This mechanism has been  
87 demonstrated in the retina (7) and is believed to be ubiquitous in the developing CNS.

#### 88 Programmed cell death

89 RGCs exhibit a very high rate of programmed death, or apoptosis (60-70% of the initial population  
90 (11)), during normal development. The CD mechanism is believed to be implicated in the selection  
91 of relevant cells in order to build a functional retina. Following this principle, cellular death has  
92 been proposed to be a consequence of RGCs not being able to establish correct axonal connections  
93 in the lateral geniculate nucleus in the thalamus (12). RGC cell death has also been shown to  
94 depend on neighbouring cells' electrical activity (13,14). Creating either spatial or functional  
95 competition between homotypic cells could lead to the formation or refinement of mosaics. Due to  
96 major differences in death rate, the importance of programmed cell death upon mosaic formation  
97 seems however to vary between cell classes, and even between subgroups within the same cell

98 class. Cell death has been proposed to contribute to mosaic formation for several cell groups in the  
99 retina, including amacrine cells (15,16) and at least one RGC type (14).

#### 100 Cellular migration

101 All retinal cells undergo migration during retinal development, both vertical (from one layer to  
102 another) and tangential (horizontal migration within the same layer). Cells can move between 20  
103 and 100  $\mu\text{m}$  tangentially from their initial location (17,18). This mechanism is believed to be  
104 implicated in mosaic formation. This has been demonstrated for SACs mosaic formation, where  
105 homotypic cells move tangentially away from each other (19). Tangential migration is believed to  
106 be a key mechanism in mosaic formation (15). Mechanisms responsible for this migration are not  
107 fully understood, even if chemical cues seem to play a key role, such as in the case of SACs (20).  
108 Diffusible signals or contact-mediated interactions between homotypic cells may be responsible for  
109 mosaic formation (21). It is important to note that mosaics appear, partially or completely, before  
110 extensive dendritic growth (21,22), and thus without contact-mediated interactions. However, other  
111 studies point out the importance of dendritic growth upon tangential migration (20,23,24). In all  
112 cases, cell-cell interactions seem to be mandatory for tangential migration.

113 Of course, it is likely that the formation of mosaic patterns is due to the combinations of all three  
114 mechanisms (22). Previous mathematical simulations of retinal mosaic formation have been  
115 conducted (5,13). These studies investigated the involvement of the CF, CD and CM mechanisms,  
116 suggesting a central role for the CM mechanism. However, these studies are highly abstract and do  
117 not mechanistically model retinal mosaic formation, thus limiting their biological relevance. No  
118 mechanistic or biologically plausible model of mosaic formation currently exists.

119 Agent-based (AB) simulation is a type of computational model in which each simulation object is  
120 an autonomous agent. Despite the absence of any global supervisor, highly complex structures can  
121 emerge from local interactions of agents that self-organise (25,26). It is a particularly relevant  
122 approach to model biological phenomena where cells exhibit this characteristic as well. Using the

123 AB approach would allow the construction of mechanistic and realistic models of retinal mosaic  
124 formation.

125 The impact and implications of all mechanisms involved in mosaic formation (cell-fate, cell death,  
126 tangential migration) are not fully understood, and much remains to be done in order to establish the  
127 detailed mechanisms governing mosaic formation. In this work, we analyse mechanisms underlying  
128 retinal mosaics self-organisation using AB computational modelling. In particular, the biological  
129 requirements and the effect of individual mechanisms generating these cellular patterns are  
130 investigated.

## 131 **Results**

### 132 RGC mosaic development

133 We demonstrate here that a realistic AB implementation of the CF is able to significantly increase  
134 the mosaic regularity compared to a random distribution ( $p < 0.001$ ). Indeed, as shown in Figure  
135 1A, the average regularity index (RI, used to assess the regularity of the mosaics) values rapidly  
136 increase from random levels (between 1.8 and 2) until reaching a value of 2.42 ( $\pm 0.09$ ) at the end of  
137 the CF mechanism. However, such RI values are lower than the experimentally observed values ( $>$   
138 3), and so cannot be considered as solely responsible for the formation of regular mosaics.  
139 Moreover, we find that the CF mechanism alone cannot explain high RI scores observed for some  
140 RGC types ( $> 5$ ). As shown in Figure 1B, if CF is the only simulated mechanism, no correlation can  
141 be established between cell density and final RI values (correlation magnitude of 0.31). Thus,  
142 mosaics of high cell density reach similar RI values as seen in mosaics of low cell density, as  
143 illustrated by the blue and orange lines in Figure 1A.

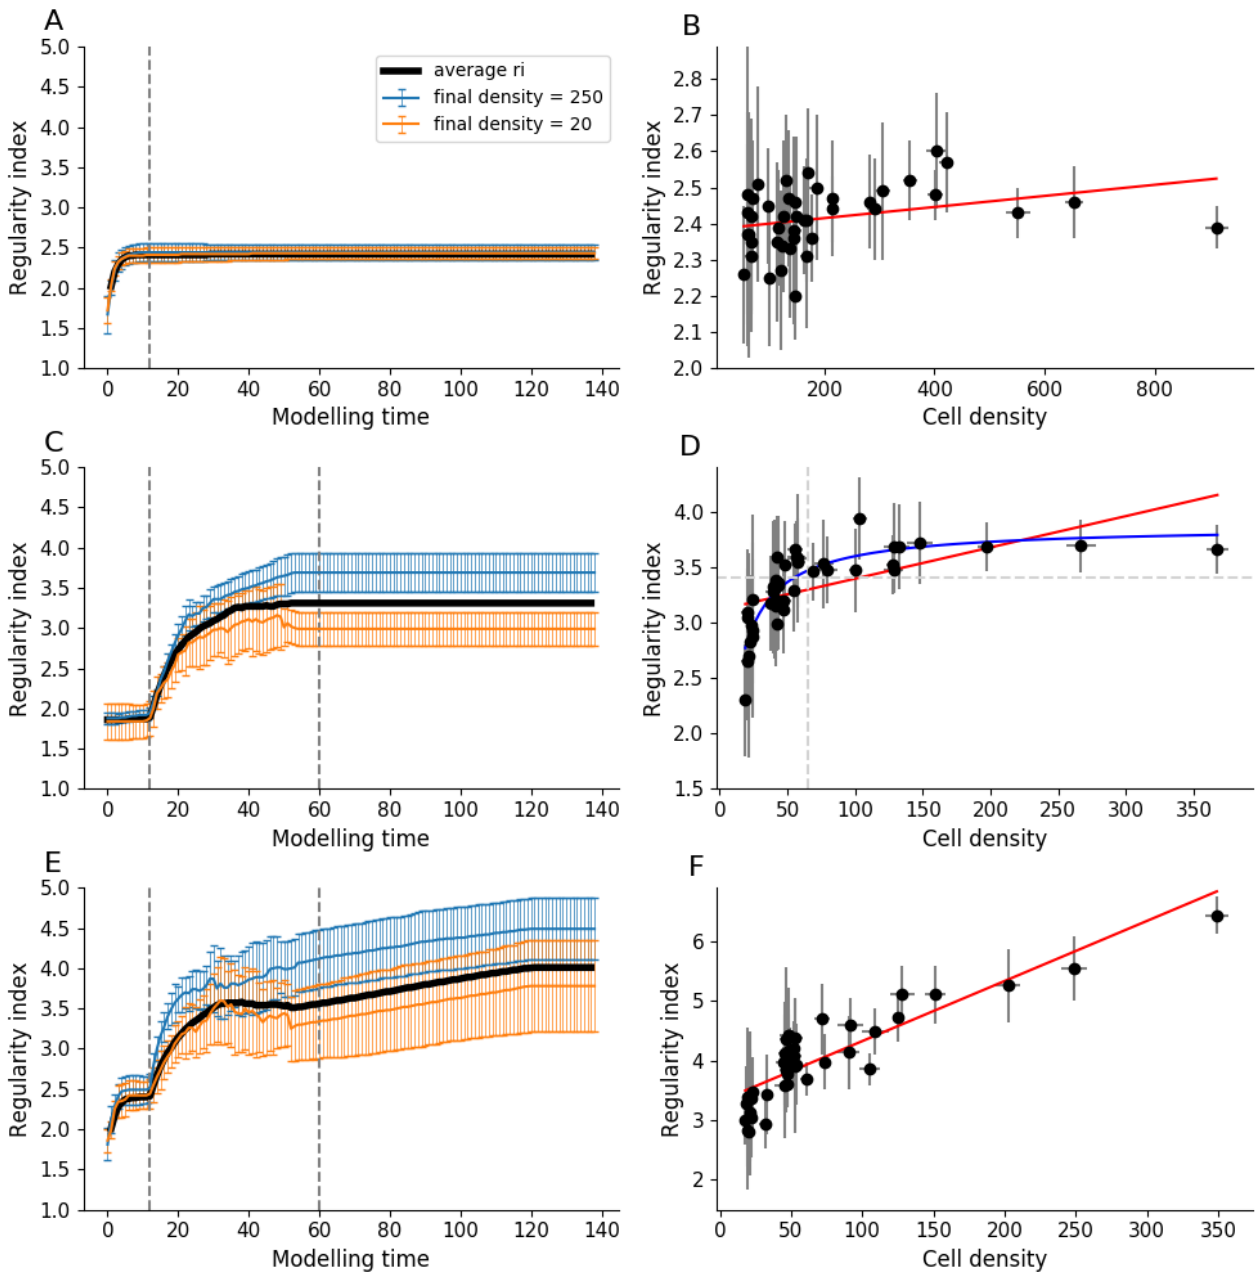

144

145 **Figure 1: RGC mosaic formation modelling using an ABM approach.** A,C,E: RI score  
 146 evolution during simulation (x axis: 10 visualisation steps correspond to 1 developmental day in  
 147 mouse). Average RI values for all RGC types are displayed in black while two populations of high  
 148 and low densities (250 and 20 cells/mm<sup>2</sup> respectively) are displayed in blue and orange. The first  
 149 vertical grey dashed line on the left indicates, if implemented, the end of the CF mechanism and if  
 150 implemented, the beginning of the CD mechanism. The second grey dashed line indicates the end of  
 151 the CD mechanism. B,D,F: Final RI score depending on cell density at the final step of the  
 152 simulation. Error bars represent standard deviations for average RIs and densities. Red lines  
 153 represent linear regressions (correlation coefficient:  $r=0.31$ ,  $r=0.58$  and  $r=0.87$  for B, D and F  
 154 respectively). The blue line in D represents a non-linear regression ( $a*x / b+x$ ), while the horizontal  
 155 dashed line represents the RI value under which no cell type of density higher than 125 is observed.  
 156 A,B: CF mechanism only. C,D: CD mechanism only. E,F: Combination of CF, CD and CM  
 157 combination.

158 The CD is also able to significantly increase RI compared to a random distribution ( $p < 0.001$ ), alone  
159 or in combination with the CF mechanism. As shown in Figure 1C, the average RI value increases  
160 from random (around 1.8) to 3.31 ( $\pm 0.33$ ) at the end of CD. This death rate amounts to around 65%  
161 when it reaches a steady state at the end of the simulation. These death rate dynamics are very  
162 similar to rates observed *in-vitro* (see Figure 2A). Moreover, and unlike for the case of the CF  
163 mechanism, CD is able to generate mosaics of medium regularities (RI > 3).

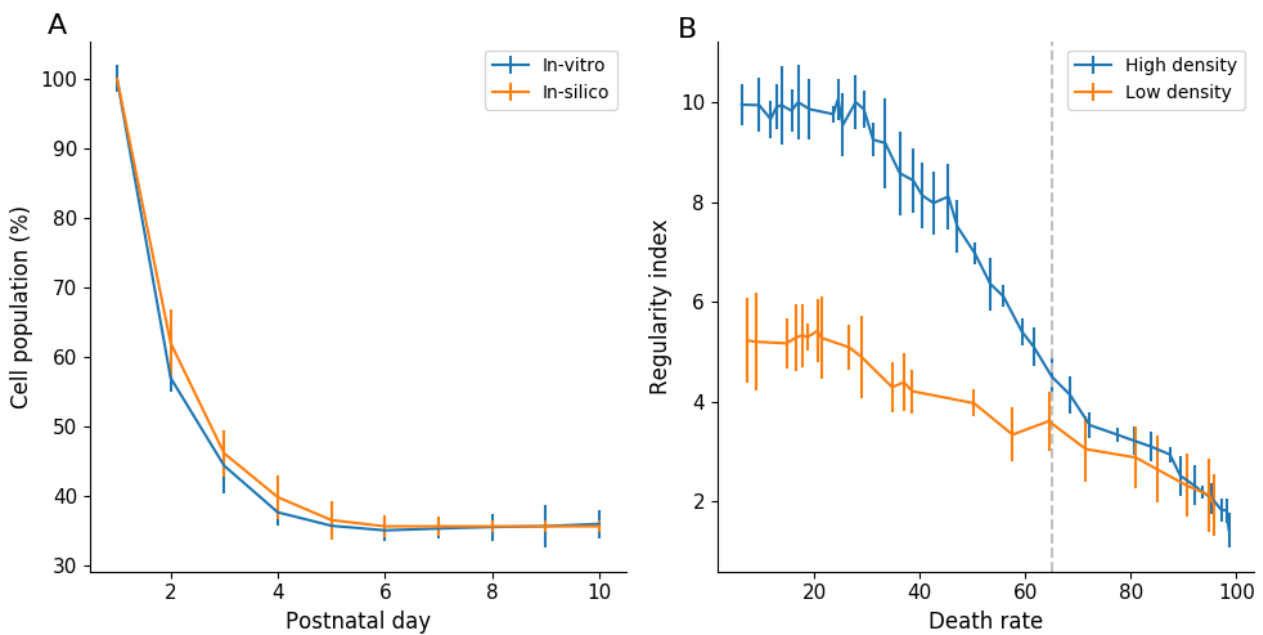

164

165 **Figure 2: CD mechanism impact on RGC population. A:** RGC population measured in-vitro  
166 (blue) and in simulations (orange). In-vitro population at day 1 is an estimation based on a final CD  
167 of 65%. Error bars represent standard deviation. **B:** RI score depending on final CD rate in a  
168 simulation implementing only the CD mechanism, for selected RGC populations of high density  
169 (blue curve, initial density = 571 cells/mm<sup>2</sup>) and low density (orange curve, initial density = 114  
170 cells/mm<sup>2</sup>). The vertical dotted line indicate a death rate of 65%. Error bars represent standard  
171 deviation.

172 Interestingly, and as shown by Figure 2B, the death rate measured *in-vitro* and selected for our  
173 simulations (grey vertical dashed line) is not the one generating the highest regularity. Indeed, the  
174 highest scores of RI are achieved for death rates between 5 and 30% of the RGC population,  
175 regardless of the initial density of the considered population. After 30% of cell death, RI decreases  
176 until it reaches a random distribution once around 90% of cell death is achieved. This is observed  
177 under both high and low-density conditions. This is observed in simulations with CD alone or in



178 combination with CF. Interestingly, and in contrast to the CF mechanism, we observe strong  
179 differences between populations of high and low initial densities. As shown in Figure 1B, the high-  
180 density population is able to generate more regular mosaics than the population of low density, both  
181 for their maximum value ( $RI > 9$  and  $RI > 5$ , respectively, when cell death is below 30%) and at  
182 65% of cell death ( $RI = 4.49 \pm 0.36$  and  $RI = 3.61 \pm 0.59$ , respectively). Therefore, a positive  
183 correlation between cell density and the final regularity is observed when the death rate is set to  
184 65%. Mosaics of low density exhibit low RI values, while those of cell density higher than 65  
185 cells/mm<sup>2</sup> (vertical dashed line of Figure 1D) exhibit a higher average RI score of 3.35 (horizontal  
186 dashed line of Figure 1D).

187 While no differences are observed in RI scores between simulation of the CD mechanism and a  
188 combination of the CF and CD mechanisms if all mosaics are considered ( $3.31 \pm 0.33$  and  $3.48$   
189  $\pm 0.44$  respectively,  $p = 0.76$ ), a positive impact on dense mosaics' regularity (for cell densities  
190 higher than 125 cells/mm<sup>2</sup>) is to be noted. Thereby, RI values in the case of CF and CD combination  
191 plateau around 4.1 instead of 3.6 if CD is the only implemented mechanism.

192 A combination of all three mechanisms (CF, CD and CM) is also able to generate mosaics  
193 significantly more regular than random distributions ( $p < 0.001$ ). Different steps of a simulation are  
194 illustrated by Figure 3.

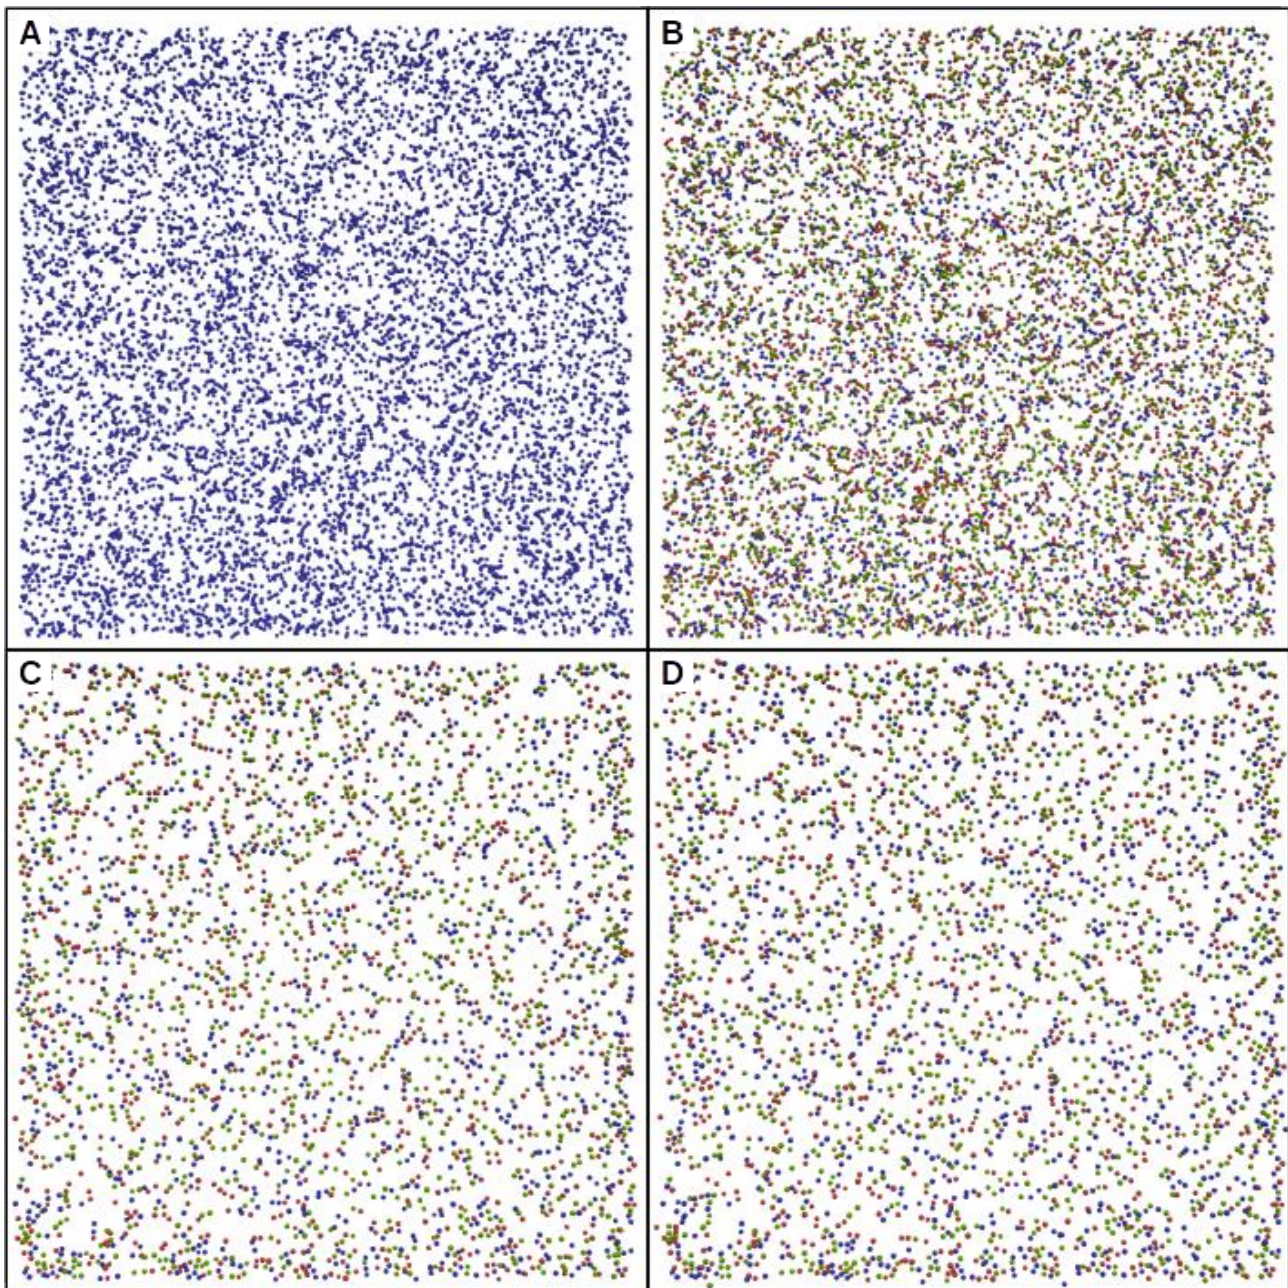

195

196 **Figure 3: Time lapse of mosaic formation, using a combination of CF, CD and CM**  
197 **mechanisms using BioDynaMo. A:** Simulation at step 0. All cells are undifferentiated and  
198 represented in blue. **B,C,D:** On cells are represented in green, Off cells in red and On-Off cells in  
199 blue. **B:** Simulation after the end of CF mechanism, at step 180. Average RI = 2.41. **C:** Simulation  
200 at the end of CD mechanism, step 1000. Average RI = 3.42. **D:** Simulation at the end of CM  
201 mechanism, step 2240. Average RI = 3.99.

202 As the CD and CM mechanisms require cells to be differentiated, CF is simulated beforehand. A  
203 first RI increase corresponding to the effect of CF is observed (see Figure 1E). After the CD and  
204 CM mechanisms are triggered (first dashed line), they give rise to a significant second increase,  
205 until the RI value stagnates toward the end of CD (simulation day 4 to 5.5 depending on the cell



206 type). Finally, a third RI increase is observed after CD is over (second dashed line) due to the CM  
207 mechanism, leading to an average RI score of 4.01 ( $\pm 0.75$ ) at the end of the simulation. Unlike any  
208 other mechanism alone, and thanks to tangential migration, this simulation condition is able to  
209 generate highly regular mosaics ( $RI > 5$ ). Moreover, a strong correlation appears between cell  
210 density and RI values (linear correlation magnitude of 0.87) as shown by Figure 1F. Thereby, only  
211 RGC types exhibiting a cell density higher than 125 cell/mm<sup>2</sup> are able to generate mosaics with a RI  
212 value higher than 5. Thus, as illustrated by the blue and orange lines in Figure 1E, significant  
213 differences emerge between mosaics of high and low density. No significant differences are seen  
214 between simulations of CD and CM combination and simulations of CF, CD and CM combination.  
215 When all three mechanisms are implemented, surviving cells migrate tangentially with an average  
216 distance of 8.72  $\mu\text{m}$  ( $\pm 0.11$ ,  $n = 8$  simulations), which is in accordance with *in-vivo* measurements  
217 reporting migration distance below 30 $\mu\text{m}$  (22). Important disparities in migration distance between  
218 cells are to be noted, as shown in Figure 4A, with an average migration distance standard deviation  
219 of 9.44 ( $\pm 0.18$ ). No correlation between final RI and migration distance can be seen. Likewise, no  
220 correlation appears between final density and migration distance if the whole population is  
221 considered. However, if only populations with a final density higher than 100 cells/mm<sup>2</sup> are  
222 considered, a strong correlation can be observed (correlation coefficient  $r = 0.92$ , see Figure 4B red  
223 line). Hence, the denser the cell type the larger the distance cells migrate.

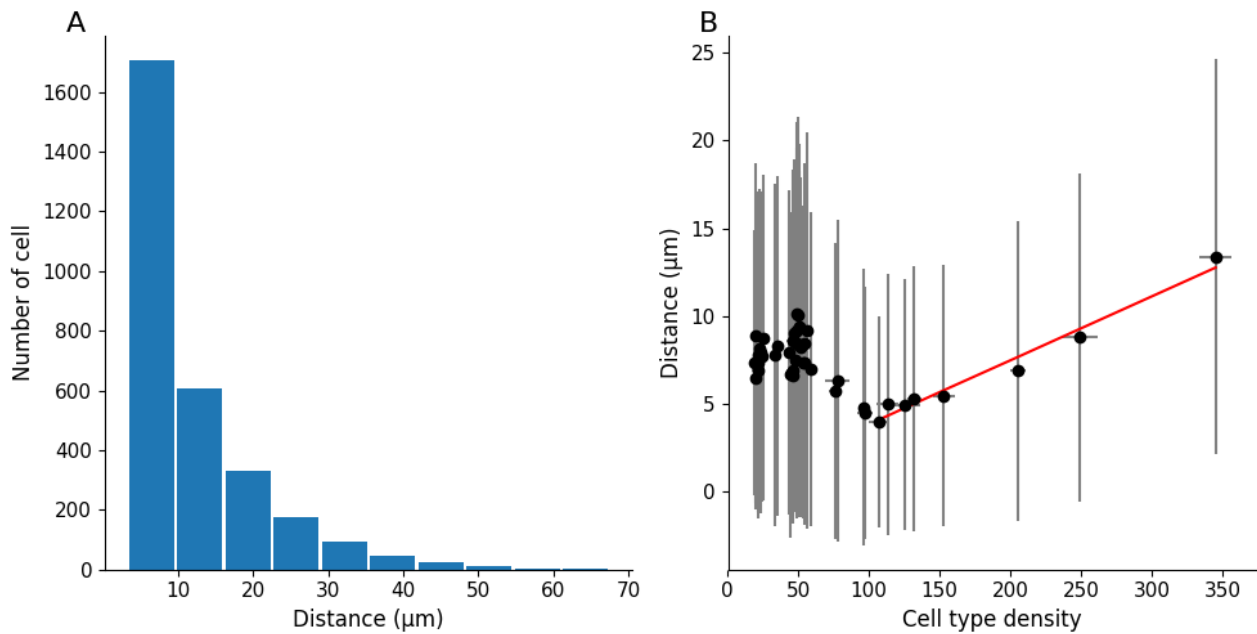

224

225 **Figure 4: Migration distance measured in simulations implementing CF, CD and CM. A:**  
226 Migration distance distribution. **B:** Relation between cell type density and migrating distance. The  
227 red line represents the correlation between migration distance and cell type density for densities  
228 higher than 100 cells/mm<sup>2</sup> (correlation coefficient  $r=0.92$ ).

#### 229 SAC mosaic development

230 The SAC population is divided between two different cellular layers, the GCL and the INL, forming  
231 two separate populations (see Figure 5 for an illustration). Our *In-vitro* results exhibit no significant  
232 differences in the GCL and INL populations densities from P4 to P10 ( $p=0.27$  and  $p=0.32$   
233 respectively, see Figure 6A). These two SAC populations exhibit regular pattern organisation, and  
234 no significant difference over time of their RI is measured from P4 to P10, as shown by Figure 6B.  
235 GCL and INL SAC mosaics are reported to be independent, in line with experimental data showing  
236 that SAC populations in the GCL and the INL only moderately overlap (20,27,28). A measure of  
237 these populations' exclusion has then been conducted, showing no significant difference from P4 to  
238 P10, as shown by Figure 6C. This indicates that the INL and GCL SAC populations have already  
239 formed regular structures from P4 (shortly after GCL and INL separation), and do not exhibit  
240 further significant cell migration. This could indicate that mosaics are already formed and do not

241 improve their regularity once SACs have migrated to their respective cellular layer. For this reason,  
242 SAC mosaics formation is implemented before GCL/INL separation in our simulations.

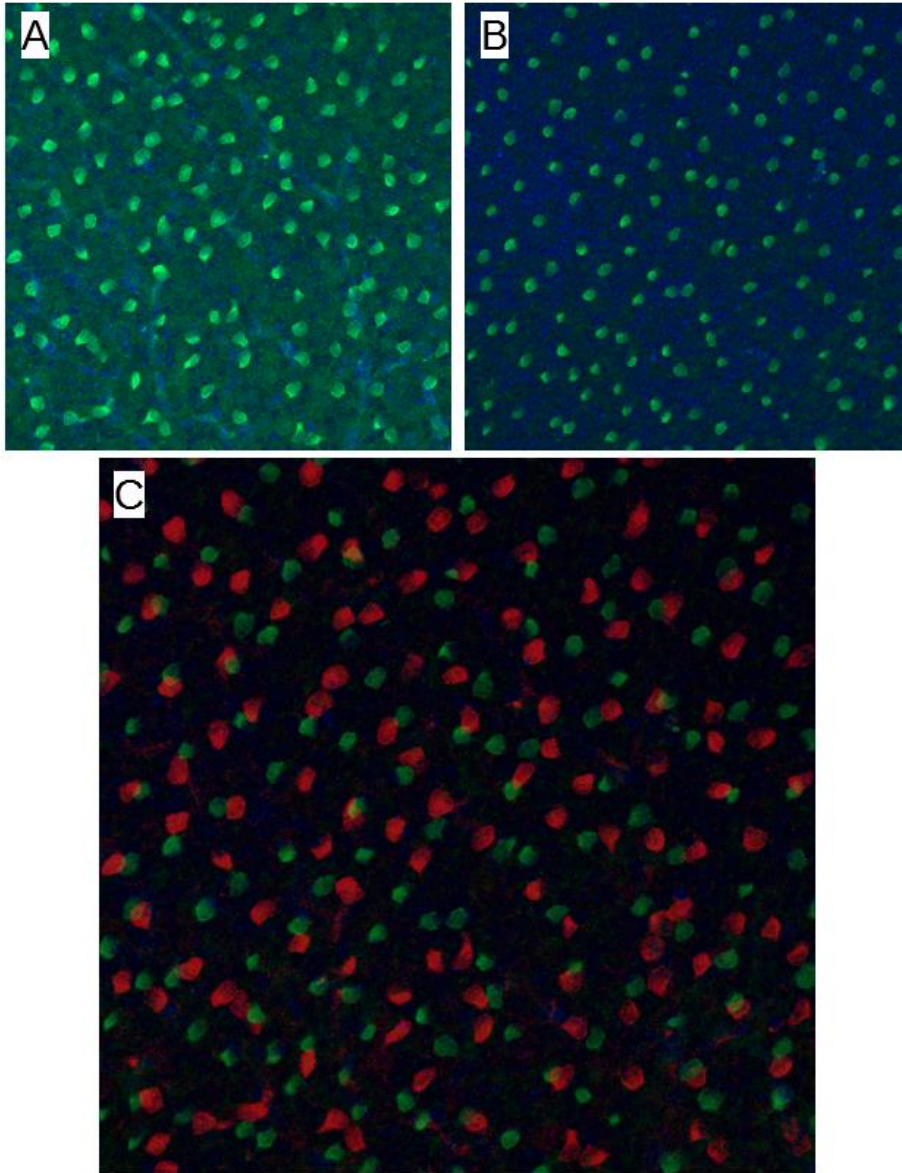

243

244 **Figure 5: ChAT immunostaining on a P9 pup retina. A: GCL level. B: INL level. C: overlap of**  
245 **GCL (red) and INL (green) levels. GCL and INL level images are taken at the same x,y position, but**  
246 **at different depth focus. Regular SACs positioning can be observed in each cellular layer. Few cells**  
247 **overlap between GCL and INL levels are noted.**

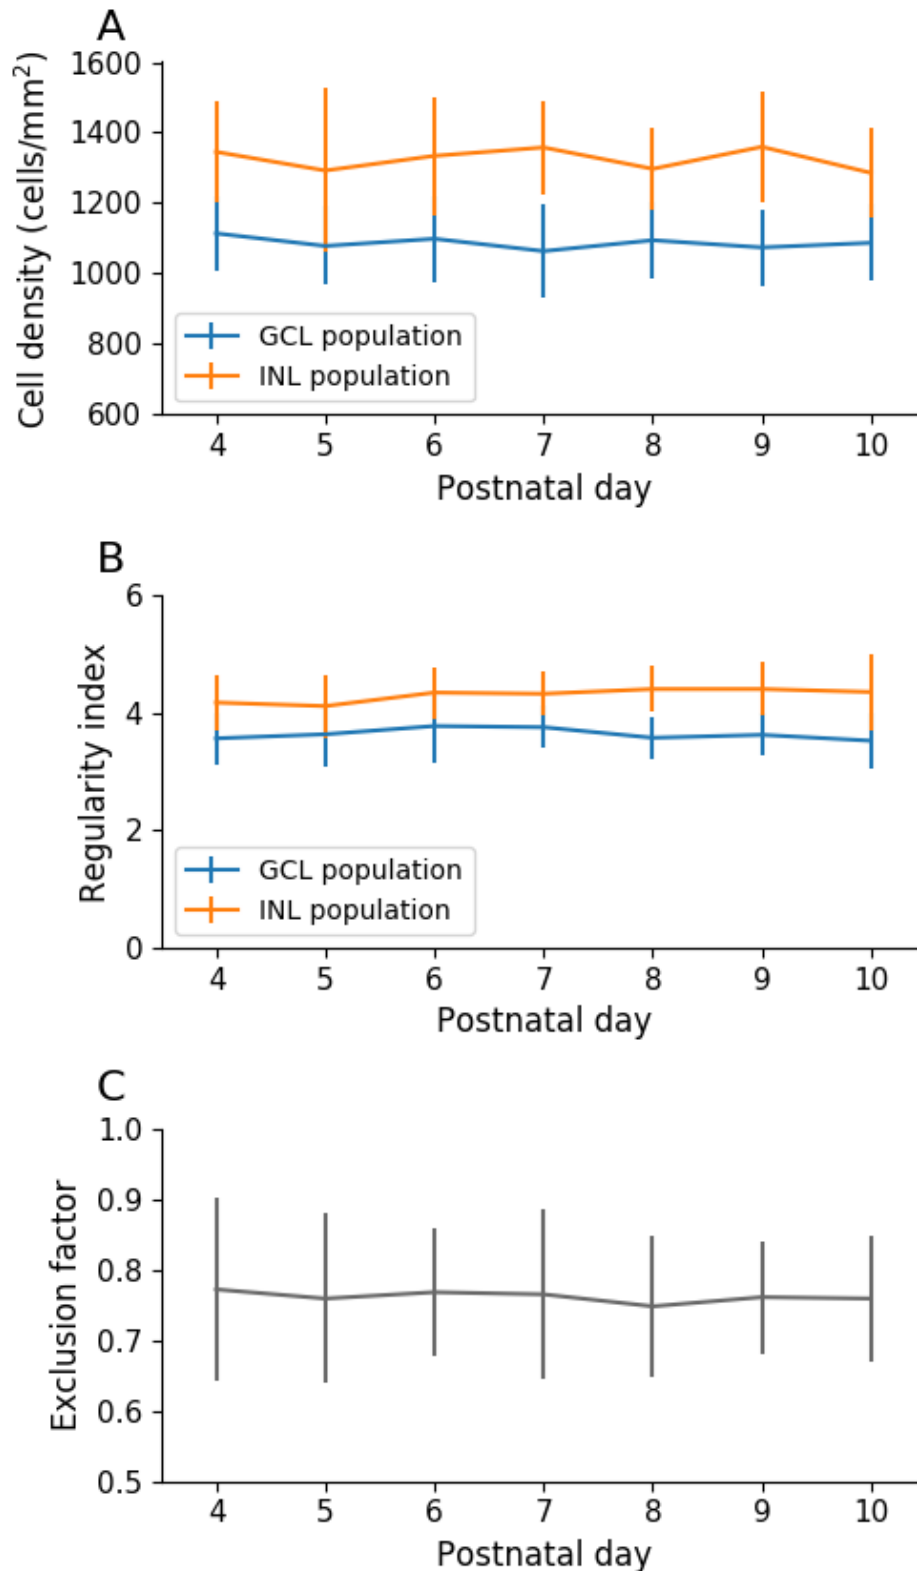

248 **Figure 6: In-vitro SAC population characteristics through development. A,B:** SACs in the GCL  
249 population are represented in blue, and the INL population is represented in orange. **A:** Cell density  
250 over time. **B:** Regularity index over time. **C: GCL and INL SAC population exclusion.** A score of  
251 1 denotes two mosaics with a perfect exclusion and a score of 0 a total overlap of mosaics.  
252 Exclusion diameter of 32 $\mu$ m. Error bars represent standard deviation. P4: n=14; P5: n=15; P6:  
253 n=14; P7: n=12; P8: n=10; P9: n=9; P10: n=10. No differences are to be noted between P4 and P10.

254 Interestingly, by using an identical concentration threshold triggering CM for SAC in the GCL and  
255 INL, the GCL SAC population exhibits less regular mosaics than the INL population at the end of  
256 the simulation. This is observed in both developmental conditions, using either one common or two  
257 separate (one for the GCL population, one for the INL population) chemical substances for mosaic  
258 formation (RI of  $3.57 \pm 0.12$  and  $4.11 \pm 0.12$  respectively when one substance is used, RI of  $3.36 \pm 0.07$   
259 and  $4.37 \pm 0.15$  respectively when two substances are used,  $n=8$  for each group,  $p < 0.0001$ ). This  
260 mosaic regularity disparity is in accordance with observations in mouse (see Figure 6B) where the  
261 INL population has been reported to be more regular than in the GCL population. In our  
262 simulations, this disparity can be explained by the cell density difference between these two layers.  
263 Indeed, and as previously demonstrated in our simulations, the denser a cell population is, the more  
264 regular its mosaic can be. Hence, our model provides a mechanistic explanation for this observed  
265 difference in RIs between the two SAC populations.

266 However, we find that an important difference emerges between the two conditions concerning the  
267 exclusion factor of the two SACs populations: if one common developmental cue is used, GCL and  
268 INL mosaics exclude each other with a calculated exclusion factor of 0.71 ( $\pm 0.01$ ,  $n=8$ ), similar to  
269 what has been measured *in-vitro* ( $0.74 \pm 0.09$ ,  $n=5$ , see Figure 6). This indicates that the GCL and  
270 INL populations' mosaics tend not to overlap, and so are not fully independent of each other.  
271 However, if two distinct developmental cues are used, the exclusion factor is lower, at 0.31 ( $\pm 0.1$ ,  
272  $n=8$ ), denoting independent mosaics that tend to overlap. In this second condition, the measured  
273 exclusion factor is significantly lower than the one observed in mouse ( $p < 0.0001$  using a T-test for  
274 two independent samples,  $n=8$  and 5 respectively). Thus, only the first condition is able to  
275 reproduce the results observed *in-vitro*.

## 276 **Discussion**

277 All computational simulations must be built upon biological data in order to offer relevant insight of  
278 a scientific problem. For this reason, information about retinal development has been gathered using  
279 in-vitro experimental observations. Thus, we followed RGCs characteristics through development  
280 using RBPMS staining in neonatal mouse retinas. This allowed us to measure death dynamic from  
281 P2 to P11. Using biological data from ours in-vitro experiments and from the literature, we built  
282 realistic simulations of retinal cells self-organization. This includes the number of RGCs types  
283 incorporated in our simulations, based on evidence from the literature (1–3). Notably, Sanes and  
284 Masland (2015) speculated that known RGC types represent only about 60% of the total RGC  
285 population, corresponding to around 1740 cells/mm<sup>2</sup> from the total 3000 cells/mm<sup>2</sup> observed in the  
286 mouse retina. In addition, it is important to note that from these known RGC populations, only  
287 12.4% are On type. As On, Off and On-Off are equally numerous (30% to 35% each), a great  
288 number of On cells still needs to be discovered in order to reach the theoretical percentage of On  
289 RGC in the total RGC population. Thus, we can hypothesize that either: 1. Several high density On  
290 types have not yet been discovered. 2. There are more On types than Off or On-Off types.

291 The first hypothesis appears unlikely as RGCs are widely studied, especially with the emergence of  
292 large-scale and high density MEA recordings, but also using morphological and molecular  
293 characterisations. Thus, it is unlikely that the existence of dense On RGC types (representing the  
294 majority of the On population, and so being the most common On type) has not been captured by at  
295 least one of these techniques. The second hypothesis appears to be supported by experimental  
296 evidences because mice, similarly to other nocturnal animals, have rod-dominated vision. Indeed,  
297 rods are known to project their dendrites and to establish synaptic connections only to On bipolar  
298 cells, that in turn establish synaptic connections to On RGCs. In order to extract as many features as  
299 possible from a visual scene using mainly rod vision, a great diversity of specialized RGCs can be  
300 justified. The hypothesis of a great diversity of low density On types is also in agreement with  
301 Masland et al., (2015), who speculate that around 30 low density RGC types exist and are yet to be  
302 discovered. Baden et al. (2016) also estimate the total number of RGC types to be over 40,



303 supporting the hypothesis of numerous low density RGC types, including On types. As it is still  
304 possible that On types of mid density has not been discovered, we chose to allow the possibility for  
305 this hypothesis in our simulations, in addition to adding multiple low density On RGCs.

306 One major basis of our simulations is the presence of chemical cues supporting cellular self-  
307 organization mechanisms. Evidences of such chemical cues have been previously reported  
308 (20,29,30).

### 309 RGC mosaic formation

310 CF implication on RGC mosaics' regularity is particularly difficult to study *in-vitro* or *in-vivo* as  
311 RGC progenitor cells do not express RGC type-specific markers cells will differentiate into. Despite  
312 experimental studies on RGC progenitors, no evidence has been found for RGC type-specific  
313 progenitors (31). Hence, RGC types are probably not pre-determined early on and so are likely to  
314 depend on extrinsic factors, such as the presence of chemical cues (7). Thereby, it allows for the  
315 contribution of a mechanism such as CF for RGC type differentiation, and its potential implication  
316 in mosaic formation. One major conclusion from our simulations is that highly regular mosaics  
317 ( $RI > 2.5$ ) cannot be explained only through the CF mechanism. Likewise, the CF mechanism does  
318 not significantly increase the power of other mechanisms (CD and/or CM) neither. This suggests  
319 that RGC types are unlikely to be defined by cell body mosaics. They may instead be dictated by  
320 intrinsic factors (that still remain to be discovered), functional determination (dictated by the input  
321 from other cells), or a combination of intrinsic factors interacting with extrinsic factors.

322 In our simulations, the CD mechanism (alone, or in combination with the CF mechanism) is able to  
323 create regular mosaics ( $RI > 3.5$ ) with a death rate of 65%. As this mechanism is based on a locally  
324 diffused chemical substance, homotypic cellular spacing (and therefore cell type initial density) has  
325 an important impact on the CD mechanism. For this reason, only populations with a high initial cell  
326 density exhibit regular mosaics. Importantly, our CD implementation is able to match measured  
327 RGC death dynamics during development, thus strengthening its plausibility. It should be pointed

328 out that CD serves additional purposes in the retinal maturation process and is not only geared  
329 towards mosaic creation. Indeed, some cell types which do exhibit mosaic regularity do not undergo  
330 any significant levels of CD (such as horizontal cells or photoreceptors). In addition, as  
331 demonstrated here, the maximum positive impact of CD upon RI is reached at death rate lower than  
332 30%, which is below the 60-70% death rate observed in mouse. This implies that even if CD can be  
333 involved in mosaic formation at early stages, cell death at levels above 30% is likely to be driven by  
334 other mechanisms and for other purposes than mosaic regularity. For instance, CD could be  
335 implicated in refining retinal functional connectivity and activity. CD could also have evolutionary  
336 advantage with regard to generating an optimised neural architecture (32).

337 Finally, CM is the only mechanism able to explain the formation of highly regular mosaics ( $RI > 5$ ).  
338 As for the CD mechanism, the efficacy of the CM mechanism is dependent on cell density as it is  
339 based on local interactions. The shorter homotypic cellular distances are, the more they can sense  
340 and repulse each other. Thereby, a strong correlation emerges between RGC type populations  
341 densities and the regularity of their mosaics. Therefore, we propose here that low density RGC type  
342 mosaics exhibit on average significantly lower regularities than high density RGC types mosaics. It  
343 would be very informative to experimentally verify this prediction. To this date, this question  
344 remains unanswered. This hypothesis is in accordance with recent studies showing that some low  
345 density RGCs do not exhibit regular spacing (33). Moreover, we question here the relevance of  
346 regular spacing as a criterion for a group of RGC to form a RGC type. Indeed, if all low density  
347 RGC types do not exhibit highly regular spacing as predicted here, this criterion does not  
348 discriminate RGC types.

349 We show here that high mosaic regularity can be achieved with limited migration distance ( $8.72\mu\text{m}$   
350  $\pm 0.11$  in average,  $n = 8$ ). This average migration distance is in accordance with *in-vivo*  
351 measurements, reporting that RGCs and SACs tangential migration does not exceed  $30\mu\text{m}$  (22).  
352 However, the average migration distance measured in our simulations is notably lower than the

353 average migration distance experimentally measured at around 20 $\mu$ m (19) and could be explained  
354 by the absence of retinal surface expansion implementation in our simulations. The CM mechanism  
355 implemented here is based only on local cues and short-distance interactions, and thereby follows  
356 the description of tangential dispersion in mouse, reported as a local, short-distance, phenomenon  
357 (21). Our results are consistent with previous studies showing that a tangential cell dispersion does  
358 not appear to be directly related to the cell time of birth, but rather to its cell type (21).

359 The cellular migration and RI dynamics resulting from the CM mechanism are in agreement with  
360 the literature, where it is reported that RI increases mostly between P1 and P5, with the spacing  
361 between cells still increasing after that period, until P10 (2). After reaching the correct cell layers, a  
362 slower and finer tangential positioning phase of RGC within the GCL has been reported (19,34).  
363 Cellular movement during this period has been described as random but important for exact cellular  
364 positioning (34). In accordance with our results and as stated by other studies (27), these highly  
365 varied movements are likely to be related to mosaic formation and refinement. Indeed, these  
366 movements appear random as the whole RGC population (On, Off, On-Off population) is  
367 considered, while RGC populations should themselves be divided into types in order to  
368 meaningfully investigate RGCs lateral migration. If it were possible to examine each type  
369 independently, our model suggests that these movements, reported as random, would appear as  
370 coherent, as illustrated by Figure 7.

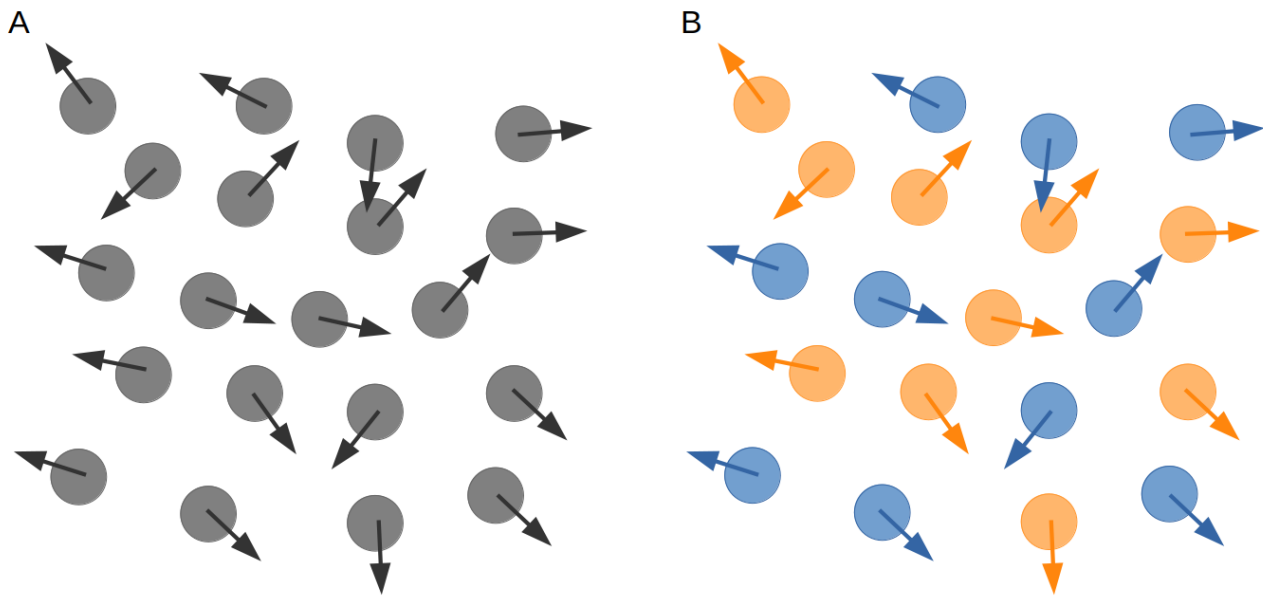

371

372 **Figure 7:** Cellular migration appearing as random if the whole population is considered  
373 homogeneously (A) or coherent (homotypic avoidance) if the population is sub-divided into two  
374 population (B).

### 375 SAC mosaic formation

376 Beside most of RGCs, other retinal cell types are known to exhibit regular spacing, including SACs.

377 This cell population is divided into the GCL and the INL. Both SAC layers form mosaics, that are

378 reported to be independent from each other. Thus, there are only few overlaps between their

379 populations. We found no RI variation from P3-4, indicating that these two SACs populations have

380 already created their mosaics by P3-4, hence shortly after SACs migration into their respective

381 cellular layer. In addition, we observed that the calculated exclusion factor does not vary, also

382 supporting this assumption. Moreover, the observed complementarity of GCL and INL mosaics

383 perhaps indicates interactions between these two SAC populations during their cellular

384 organisation, before they migrate to their respective layer.

385 Here, we investigated this GCL/INL population interaction hypothesis further by building a

386 simulation of SACs mosaics development. These simulations clearly show that our modelling

387 procedure can successfully be applied to another cell population, without changing any simulation

388 parameters. Indeed, we have been able to explain differences in GCL and INL mosaic regularities

389 (the RI of the INL population being higher than that of the GCL population) by using only local  
390 interactions between SACs. This is the case if SACs constitute a unique population, or if GCL and  
391 INL populations are distinct (in other words, if one common or two distinct chemical cues are  
392 used). In the former case, this RI difference can be explained by the higher number of cells  
393 migrating to the INL compared to the GCL. Precisely, the percentage of a population characterised  
394 by a highly regular mosaic dictates the regularity of the resulting sub-population. Hence, the bigger  
395 the sub-population, the closer the obtained RI will be to the RI of the initial population, if cells  
396 constituting this sub-population are chosen randomly. For instance, if a population with a high RI is  
397 randomly divided into two sub-populations of 80% and 20% of the initial population (denoted  
398 respectively sub-population A and B), the sub-population A will have a RI closer to the initial  
399 population than the sub-population B. Thus, in the latter case, this observed RI difference between  
400 the GCL and INL populations can be explained by the higher cell density of SACs in the INL. This  
401 higher cell density in the INL allows more interactions and homotypic repulsion and thus the  
402 emergence of a higher RI than for the cells located in the GCL.

403 However, and importantly, only the simulation condition using a common chemical cue for mosaic  
404 formation is able to explain the complementarity observed between the GCL and INL populations.  
405 Indeed, if the two mosaics (GCL and INL) are formed independently, they largely overlap without  
406 exhibiting the mutual exclusion observed in-vitro. This suggests that the GCL and INL populations  
407 of SACs are not fully independent. Hence, our results predict that a shared guidance cue is  
408 responsible for mosaic formation of SACs in the GCL and INL. Locally diffused chemical  
409 (molecular) guidance could be a possible cue candidate for mosaic formation. If this is the case, our  
410 prediction could be potentially experimentally verified by using knock-out experiments blocking  
411 either the secretion or the reception of this chemical guidance.

## 412 **Methods**

### 413 **Experimental work**

414 Immunohistochemistry

415 Retinal wholemounts were prepared from mouse pups aged P2-P11, flattened on nitrocellulose  
416 membrane filters and fixed for 45 min in 4% paraformaldehyde. Retinas were then incubated in  
417 blocking solution — consisting in 5% of secondary antibody host species serum with 0.5% Triton  
418 X-100 in 0.1M phosphate buffer solution (PBS) — for 1 hour.

419 Retinas were incubated with 0.5% Triton X-100 with RBPMS (1:500) and ChAT (1:500) in PBS for  
420 3 days at 4°C, then washed with PBS and incubated with 0.5% Triton X-100 with donkey anti rabbit  
421 Alexa 568 (1:500) and donkey anti goat Dylight 488 (1:500) in PBS for 1 day at 4°C. Finally,  
422 retinas were washed with PBS and embedded with OptiClear. Primary antibodies used were ChAT  
423 (AB144P, goat polyclonal, Merck Millipore) for SACs staining and RBPMS (1830-RBPMS, rabbit  
424 polyclonal, Phosphosolutions) for RGCs staining. Secondary antibodies used were Donkey anti  
425 rabbit Alexa 568 (A10042, Invitrogen) and Donkey anti goat Dylight 488 (SA5-10086,  
426 ThermoFisher Scientific).

427 Zeiss AxioImager with Apotome processing and the Zeiss LSM 800 confocal microscope were used  
428 to image the retinas. High-resolution of the whole retinal surface was achieved by imaging multiple  
429 individual adjacent areas. Individual images were subsequently stitched back together to view the  
430 entire retinal surface. Images at 40x magnification were also acquired in mid-peripheral regions in  
431 order to perform cell count and mosaic regularity measures.

432 Cell populations density

433 The average RGC and SAC density for each developmental day was measured by performing a  
434 manual cell count from P2 to P10 for RGCs and from P4 to P10 for SACs. By accounting for the  
435 surface expansion observed during retinal development, we estimated changes in populations  
436 through development. The estimated total RGC and SAC populations for a given retina are  
437 calculated by multiplying the averaged cell density (obtained from 3-6 sample areas per retina) by  
438 its corresponding retinal surface. These individual measurements are then averaged for each

439 developmental day to give an estimation of the total population from P2 to P10. Cell population  
440 death rate during development is then calculated. In detail, the population of each retina measured  
441 on day D+1 is subtracted from the population of each retina measured on day D to calculate the  
442 amount of CD between day D and D+1. The amount of apoptosis measured between two  
443 consecutive days is then averaged to calculate the daily death rate of RGC and SAC populations.  
444 SAC populations in the GCL and INL are calculated separately.

#### 445 SAC mosaics

446 Positions of SACs in the GCL and INL are also extracted in order to calculate mosaic regularities of  
447 these two populations from P4 to P10. A measure of GCL and INL mosaics exclusion has also been  
448 conducted. The calculated exclusion factor is based, for two distinct populations, on a count of cells  
449 from the first populations located within a determined distance (exclusion diameter) from cells  
450 belonging of the second population. This score is then normalised, to give an exclusion factor  
451 between 0 and 1. 1 denotes a perfect exclusion, meaning that all cells of the first population are  
452 located at a distance greater than the exclusion diameter from all cells of the second population. By  
453 consequence, only exclusion factors calculated with an identical exclusion diameter can be  
454 compared. A unique exclusion diameter of 32 $\mu$ m has been chosen here, corresponding to about 3  
455 times the diameter of a SAC soma, and allowing a good discrimination between our different  
456 mosaics.

#### 457 Ethics Statement

458 The experimental work was approved by the Animal Welfare Ethical Review Board (AWERB) of  
459 Newcastle University.

#### 460 **BioDynaMo**

461 Simulations were conducted using the agent-based simulation framework BioDynaMo (35).

462 Each object in BioDynaMo is denoted as a simulation object, and possesses its own characteristics,  
463 such as its 3D geometry, mass, adherence and position in space. Individual neurons are represented  
464 by a sphere. Diffusion in 3D of chemical substances in the extracellular space has also been  
465 implemented, with the discrete central difference method. This diffusion is supported by grids  
466 representing substances concentration and gradients. Mechanical forces are also taken into account  
467 between all simulation objects such that they cannot overlap, but mechanically repulse each other.  
468 Each simulation object can have a *biology module* attached to it, that describes its behaviour at each  
469 simulation time step, such as substance secretion, cell migration or cell growth.

470 As an AB simulation framework, each simulation object is independent, without a central  
471 organisation unit that orchestrates the behaviour of all simulation objects. Thus, simulation objects  
472 only have access to their micro-environment, which consists of other simulation and chemical  
473 substances of the extracellular matrix in their proximity.

474 Several *biology modules* have been defined and used in our simulations, in order to describe cells  
475 behaviour for self-organisation (cell fate, cell death and cell migration) and chemical substances  
476 secretion.

## 477 **Simulations**

478 All simulations took place in a cubic space of  $1,300\mu\text{m}^3$ , with cells of 7 to  $8\mu\text{m}$  diameter randomly  
479 distributed (uniform distribution) in a space of  $1,000\mu\text{m}\times 1,000\mu\text{m}\times 22\mu\text{m}$ . The initial cell density  
480 has been set to  $8600\text{ cells}/\text{mm}^2$ , in order to reach the RGC density once programmed CD  
481 mechanism is over — around  $3000\text{ cells}/\text{mm}^2$  reported in literature (3) and around  $3500\text{ cells}/\text{mm}^2$  in  
482 our measures. Mechanical interactions between simulation objects are taken into account, such that  
483 they cannot overlap, and mechanically repulse each other. The time step is set such that 160 steps  
484 simulate one day of development. Mosaic formation simulations run for a maximum of 2240 steps,  
485 corresponding to 14 days of development.



486 The global RGC population is subdivided into 43 types. Some have been precisely documented,  
487 such as the On or On-Off direction selective ganglion cells (DSGC), the local edge detector (LED),  
488 or the Off J-RGCs, and their population densities and dendritic arbours characteristics are known.  
489 However, these precisely documented RGC groups represent only 19 types, and merely about 60%  
490 of the total RGC population ( $\sim 1700$  cells/mm<sup>2</sup> over  $\sim 3000$  cells/mm<sup>2</sup>) (3). RGC types composing the  
491 remaining 40% of the population have been estimated using results from Sanes and Masland  
492 (2015), Reese and Keeley (2015) and Baden et al. (2016). These authors state that numerous RGC  
493 types are still unknown and these cells are probably sparsely distributed across the retina. Thus, we  
494 implemented 24 additional RGC types of various but low densities. All implemented RGC types  
495 and their corresponding starting and final densities are summarised in Table 1.

| Cell type | Type name    | Start density cells/mm <sup>2</sup> | Final density cells/mm <sup>2</sup> | D Death | FD Death | FDM Death | FDM Migration |
|-----------|--------------|-------------------------------------|-------------------------------------|---------|----------|-----------|---------------|
| 0         | on-off_dsgca | 357                                 | 125                                 | 2.0367  | 2.0334   | 2.023     | 2.02          |
| 1         | on-off_dsgcb | 357                                 | 125                                 | 2.0367  | 2.0334   | 2.023     | 2.02          |
| 2         | on-off_dsgcc | 357                                 | 125                                 | 2.0367  | 2.0334   | 2.023     | 2.02          |
| 3         | on-off_dsgcd | 357                                 | 125                                 | 2.0367  | 2.0334   | 2.023     | 2.02          |
| 4         | on-off_m3    | 57                                  | 20                                  | 1.9872  | 1.9855   | 1.9855    | 1.983         |
| 5         | on-off_led   | 714                                 | 250                                 | 2.116   | 2.098    | 2.08      | 2.065         |
| 6         | on-off_u     | 57                                  | 20                                  | 1.9872  | 1.9855   | 1.985     | 1.983         |
| 7         | on-off_v     | 57                                  | 20                                  | 1.9872  | 1.9855   | 1.985     | 1.983         |
| 8         | on-off_w     | 171                                 | 60                                  | 2.001   | 1.9978   | 1.996     | 1.994         |
| 9         | on-off_x     | 143                                 | 50                                  | 1.9968  | 1.9945   | 1.994     | 1.9925        |
| 10        | on-off_y     | 114                                 | 40                                  | 1.994   | 1.993    | 1.993     | 1.991         |
| 11        | on-off_z     | 114                                 | 40                                  | 1.994   | 1.993    | 1.993     | 1.991         |
| 100       | on_dsgca     | 114                                 | 40                                  | 1.994   | 1.993    | 1.993     | 1.991         |
| 101       | on_dsgcb     | 114                                 | 40                                  | 1.994   | 1.993    | 1.993     | 1.991         |
| 102       | on_dsgcc     | 114                                 | 40                                  | 1.994   | 1.993    | 1.993     | 1.991         |
| 103       | on_aplha     | 114                                 | 40                                  | 1.994   | 1.993    | 1.993     | 1.991         |
| 104       | on_m2        | 160                                 | 56                                  | 2       | 1.9953   | 1.994     | 1.992         |
| 105       | on_m4        | 57                                  | 20                                  | 1.9872  | 1.9855   | 1.985     | 1.983         |
| 106       | on_m5        | 57                                  | 20                                  | 1.9872  | 1.9855   | 1.985     | 1.983         |
| 107       | on_o         | 428                                 | 150                                 | 2.05    | 2.0425   | 2.035     | 2.031         |
| 108       | on_p         | 286                                 | 100                                 | 2.022   | 2.018    | 2.012     | 2.01          |
| 109       | on_q         | 286                                 | 100                                 | 2.022   | 2.018    | 2.012     | 2.01          |
| 110       | on_r         | 228                                 | 80                                  | 2.011   | 2.0082   | 2.004     | 2.002         |
| 111       | on_s         | 171                                 | 60                                  | 2.001   | 1.9978   | 1.995     | 1.993         |
| 112       | on_t         | 171                                 | 60                                  | 2.001   | 1.9978   | 1.995     | 1.993         |
| 113       | on_u         | 143                                 | 50                                  | 1.9968  | 1.9945   | 1.994     | 1.9925        |
| 114       | on_v         | 143                                 | 50                                  | 1.9968  | 1.9945   | 1.994     | 1.9925        |
| 115       | on_w         | 97                                  | 34                                  | 1.993   | 1.9934   | 1.989     | 1.987         |
| 116       | on_x         | 57                                  | 20                                  | 1.9872  | 1.9855   | 1.985     | 1.983         |
| 117       | on_y         | 57                                  | 20                                  | 1.9872  | 1.9855   | 1.985     | 1.983         |
| 118       | on_z         | 57                                  | 20                                  | 1.9872  | 1.9855   | 1.985     | 1.983         |
| 200       | off_aplhaa   | 114                                 | 40                                  | 1.994   | 1.993    | 1.993     | 1.991         |
| 201       | off_aplhab   | 114                                 | 40                                  | 1.994   | 1.993    | 1.993     | 1.991         |
| 202       | off_m1       | 180                                 | 63                                  | 2.006   | 1.9979   | 1.998     | 1.996         |
| 203       | off_j        | 571                                 | 200                                 | 2.078   | 2.065    | 2.058     | 2.049         |
| 204       | off_mini_j   | 1000                                | 350                                 | 2.179   | 2.155    | 2.134     | 2.098         |
| 205       | off_midi_j   | 228                                 | 80                                  | 2.011   | 2.0082   | 2.004     | 2.002         |
| 206       | off_u        | 57                                  | 20                                  | 1.9872  | 1.9855   | 1.985     | 1.983         |
| 207       | off_v        | 57                                  | 20                                  | 1.9872  | 1.9855   | 1.985     | 1.983         |
| 208       | off_w        | 171                                 | 60                                  | 2.001   | 1.9978   | 1.995     | 1.993         |
| 209       | off_x        | 143                                 | 50                                  | 1.9968  | 1.9945   | 1.994     | 1.9925        |
| 210       | off_y        | 114                                 | 40                                  | 1.994   | 1.993    | 1.993     | 1.991         |
| 211       | off_z        | 106                                 | 37                                  | 1.9935  | 1.9928   | 1.989     | 1.988         |

496

497 **Table 1: Implemented RGC types and parameters used for different conditions. D:** death  
 498 **mechanism only. FD:** fate and death mechanisms. **FDM:** fate, death and migration mechanisms.  
 499 **Death:** concentration threshold for death mechanism. **Migration:** concentration threshold for  
 500 migration mechanism. Parameters have been empirically chosen.

501 Cells are created with no predefined types when simulating the CF mechanism. Otherwise, cells of  
 502 each RGC type are created matching their experimentally observed initial density.

503 Substance secretion

504 Each RGC type secretes a specific chemical substance that diffuses in the extracellular space, using  
505 grids of  $2\mu\text{m}^3$  voxels. This secretion corresponds to an increase of substance concentration by 1 at  
506 the cell centre position. Undifferentiated cells do not secrete any substance.

507 RGC mosaic formation: CF

508 CF is implemented such that substances act as an inhibitor for cell differentiation, preventing  
509 nearby undifferentiated cells to adopt the same types. In this way, neighbouring cells are forced to  
510 differentiate into other RGC types. CF is the first event to occur during simulations, because CD  
511 and CM mechanisms operate on differentiated cells.

512 RGC mosaic formation: CD

513 The CD mechanism corresponds to the cells removing themselves from the simulation if their  
514 corresponding substance concentration is higher than a defined threshold. In this way, the clusters of  
515 homotypic cells exhibit high death rates and become sparser. As the cell density decreases, the  
516 initial multilayer collapses into a RGC monolayer. This is implemented as cells moving along the z  
517 axis toward the centre of the RGC layer, using their chemical cue. CD is triggered after completion  
518 of CF, and continues until a steady-state is reached, around a death rate of 65%. This steady-state is  
519 reached without global controllers but depends on the chosen concentration threshold triggering cell  
520 death. If this threshold is low the steady-state will be reached with a high death rate, while if this  
521 threshold is high the steady-state will be reached with a low death rate.

522 RGC mosaic formation: CM

523 CM is implemented such that the homotypic substances act as a repulsive factor. Thereby, cells  
524 exhibit short distance avoidance, moving tangentially against their substance gradient, distancing  
525 themselves from homotypic neighbours. We assume that CM is triggered after completion of CF, at  
526 the same time as CD, and continues either until a steady state or day 13 is reached.

527 Development conditions incorporating all combinations of these three mechanisms have been  
528 investigated. As the mechanisms influence each other, parameters vary depending on the  
529 implemented mechanisms. The CD mechanism parameters were chosen for each RGC type such  
530 that its final death rate is about 65%. The CM parameters were chosen depending on the CD  
531 parameter value and such that the interaction is kept to close range distance. Pseudocode  
532 corresponding to these three *biology modules* can be found in Pseudocode 1. Table 1 summarises  
533 the parameters used for RGC mosaics formation mechanisms.

```
A
  input: CellElement cell, Simulation simulation
1  if cell.GetCellType() == -1 then
2    potential_type ← empty list
3    pos ← cell.GetPosition()
4    substances_list ← simulation.GetSubstances()
5    for substance in substances_list then
6      concentration ← substance.GetConcentration(pos)
7      if concentration < threshold:
8        potential_type.Add(substance.GetType())
9    end
10   end
11   cumulative_probability ← empty list
12   for type in potential_type then
13     cumulative_probability.Add(type.GetProbability())
14   end
15   rand ← random (0, Sum(cumulative_probability))
16   index ← 0
17   while rand > cumulative_probability[index] then
18     index ← index + 1
19   end
20   cell type ← potential_type[index]

B
  input: CellElement cell, ChemicalSubstance substance
1  pos ← cell.GetPosition()
2  concentration ← substance.GetConcentration(pos)
3  if concentration > threshold and Rndom(0, 1) < death_probability then
4    cell.Remove()
5  end

C
  input: CellElement cell, ChemicalSubstance substance
1  pos ← cell.GetPosition()
2  concentration ← substance.GetConcentration(pos)
3  if concentration > threshold then
4    direction ← substance.GetGradient() * reverse_gradient
5    cell.UpdatePosition(direction)
6  end
```

534

535 Pseudocode 1: **Pseudocode describing biology modules. A:** cell fate. **B:** cell death. **C:** cell  
536 migration.

## 537 SAC mosaic formation

538 The simulation of SAC mosaic formation is achieved using locally diffused chemical cues  
539 triggering homotypic avoidance (tangential migration mechanism). Once mosaics are formed, the  
540 two populations migrate to their respective layers, along the Z axis. Two different developmental  
541 conditions have been implemented, using either one common or two separated (one for GCL  
542 population, one for INL population) chemical substances for mosaics formation. Importantly,  
543 concentration thresholds are identical for the GCL and INL populations. Parameters have been set  
544 such that the mosaic RIs match the measured RIs in mouse SACs mosaics.

## 545 **Data analysis**

546 The RI was used to assess the regularity of the mosaics. It is computed as the average value of the  
547 closest neighbour distribution (distribution of the closest neighbour measured for each cell) divided  
548 by its standard deviation (36). The RI offers a single score that is able to discriminate regularity  
549 differences between mosaics of low regularities. In addition, and as previously reported by Reese  
550 and Keeley (2015), the RI offers a scale-invariant measure of mosaic regularity and thus more direct  
551 evidence of any change in the mosaic spatial organisation during development. It is not only the  
552 absolute RI value that carries information, but also its evolution across development, related to the  
553 contribution of each mosaic developmental mechanism (CF, CD, CM). However, it should be  
554 pointed out that RI is sensitive to a low sampling rate, leading to significant variability in RI scores  
555 for mosaics constituted of few cells.

556 Comparisons between two RI values have been conducted using T-tests for two independent  
557 samples.

## 558 **Author Contributions**

559 JdM, ES and RB conceived and designed the experiments and wrote the paper. JdM performed the  
560 experiments and analyzed the data.

## 561 **References**

- 562 1. Baden T, Berens P, Franke K, Román Rosón M, Bethge M, Euler T. The functional diversity  
563 of retinal ganglion cells in the mouse. *Nature*. 2016 Jan 21;529(7586):345–50.
- 564 2. Reese BE, Keeley PW. Design principles and developmental mechanisms underlying retinal  
565 mosaics. *Biol Rev Camb Philos Soc*. 2015 Aug;90(3):854–76.
- 566 3. Sanes JR, Masland RH. The types of retinal ganglion cells: current status and implications  
567 for neuronal classification. *Annu Rev Neurosci*. 2015 Jul 8;38:221–46.
- 568 4. Farah MH. Neurogenesis and cell death in the ganglion cell layer of vertebrate retina. *Brain*  
569 *Res Rev*. 2006 Sep;52(2):264–74.
- 570 5. Eglén SJ. Development of regular cellular spacing in the retina: theoretical models. *Math*  
571 *Med Biol*. 2006 Jun;23(2):79–99.
- 572 6. McCabe KL, Gunther EC, Reh TA. The development of the pattern of retinal ganglion cells  
573 in the chick retina: mechanisms that control differentiation. *Development*. 1999  
574 Dec;126(24):5713–24.
- 575 7. Livesey FJ, Cepko CL. Vertebrate neural cell-fate determination: Lessons from the retina.  
576 *Nat Rev Neurosci*. 2001 Feb;2(2):109–18.
- 577 8. Kohwi M, Doe CQ. Temporal fate specification and neural progenitor competence during  
578 development. *Nat Rev Neurosci*. 2013 Dec;14(12):823–38.
- 579 9. Rodríguez M, Choi J, Park S, Sockanathan S. Gde2 regulates cortical neuronal identity by  
580 controlling the timing of cortical progenitor differentiation. *Development*. 2012 Oct  
581 15;139(20):3870–9.
- 582 10. Zhang XM, Yang XJ. Regulation of retinal ganglion cell production by Sonic hedgehog.  
583 *Development*. 2001 Mar 15;128(6):943–57.
- 584 11. Finlay B, Pallas S. Control of cell number in the developing mammalian visual system.  
585 *Progress in Neurobiology*. 1989;32(3):207–34.

- 586 12. Jeffery G. Retinal ganglion cell death and terminal field retraction in the developing rodent  
587 visual system. *Brain Res.* 1984 Mar;315(1):81–96.
- 588 13. Eglen SJ, Willshaw DJ. Influence of cell fate mechanisms upon retinal mosaic formation: a  
589 modelling study. *Development.* 2002 Dec;129(23):5399–408.
- 590 14. Jeyarasasingam G, Snider CJ, Ratto GM, Chalupa LM. Activity-regulated cell death  
591 contributes to the formation of ON and OFF alpha ganglion cell mosaics. *J Comp Neurol.*  
592 1998 May 11;394(3):335–43.
- 593 15. Hoon M, Okawa H, Della Santina L, Wong ROL. Functional architecture of the retina:  
594 development and disease. *Prog Retin Eye Res.* 2014 Sep;42:44–84.
- 595 16. Resta V, Novelli E, Di Virgilio F, Galli-Resta L. Neuronal death induced by endogenous  
596 extracellular ATP in retinal cholinergic neuron density control. *Development.* 2005  
597 Jun;132(12):2873–82.
- 598 17. Reese BE, Necessary BD, Tam PP, Faulkner-Jones B, Tan SS. Clonal expansion and cell  
599 dispersion in the developing mouse retina. *Eur J Neurosci.* 1999 Aug;11(8):2965–78.
- 600 18. Reese BE, Harvey AR, Tan SS. Radial and tangential dispersion patterns in the mouse retina  
601 are cell-class specific. *Proceedings of the National Academy of Sciences.* 1995 Mar  
602 28;92(7):2494–8.
- 603 19. Galli-Resta L, Resta G, Tan SS, Reese BE. Mosaics of islet-1-expressing amacrine cells  
604 assembled by short-range cellular interactions. *J Neurosci.* 1997 Oct 15;17(20):7831–8.
- 605 20. Kay JN, Chu MW, Sanes JR. MEGF10 and MEGF11 mediate homotypic interactions  
606 required for mosaic spacing of retinal neurons. *Nature.* 2012 Mar;483(7390):465–9.
- 607 21. Reese BE, Galli-Resta L. The role of tangential dispersion in retinal mosaic formation.  
608 *Progress in Retinal and Eye Research.* 2002 Mar;21(2):153–68.
- 609 22. Nguyen-Ba-Charvet KT, Chédotal A. Development of retinal layers. *C R Biol.* 2014  
610 Mar;337(3):153–9.

- 611 23. Galli-Resta L. Putting neurons in the right places: local interactions in the genesis of retinal  
612 architecture. *Trends Neurosci.* 2002 Dec;25(12):638–43.
- 613 24. Huckfeldt RM, Schubert T, Morgan JL, Godinho L, Di Cristo G, Huang ZJ, et al. Transient  
614 neurites of retinal horizontal cells exhibit columnar tiling via homotypic interactions. *Nat*  
615 *Neurosci.* 2009 Jan;12(1):35–43.
- 616 25. Bauer R, Zubler F, Pfister S, Hauri A, Pfeiffer M, Muir DR, et al. Developmental self-  
617 construction and -configuration of functional neocortical neuronal networks. *PLoS Comput*  
618 *Biol.* 2014 Dec;10(12):e1003994.
- 619 26. Kassraian-Fard P, Pfeiffer M, Bauer R. A generative growth model for thalamocortical  
620 axonal branching in primary visual cortex. *PLoS Comput Biol.* 2020 Feb;16(2):e1007315.
- 621 27. Chow RW, Almeida AD, Randlett O, Norden C, Harris WA. Inhibitory neuron migration and  
622 IPL formation in the developing zebrafish retina. *Development.* 2015 Aug 1;142(15):2665–  
623 77.
- 624 28. Rockhill RL, Euler T, Masland RH. Spatial order within but not between types of retinal  
625 neurons. *Proceedings of the National Academy of Sciences.* 2000 Feb 29;97(5):2303–7.
- 626 29. Edwards MM, Mammadova-Bach E, Alpy F, Klein A, Hicks WL, Roux M, et al. Mutations  
627 in Lama1 Disrupt Retinal Vascular Development and Inner Limiting Membrane Formation.  
628 *Journal of Biological Chemistry.* 2010 Mar;285(10):7697–711.
- 629 30. Tissir F, Goffinet AM. Reelin and brain development. *Nat Rev Neurosci.* 2003  
630 Jun;4(6):496–505.
- 631 31. Sweeney NT, James KN, Nistorica A, Lorig-Roach RM, Feldheim DA. Expression of  
632 transcription factors divides retinal ganglion cells into distinct classes. *J Comp Neurol.* 2019  
633 Jan 1;527(1):225–35.
- 634 32. Bauer R, Clowry GJ, Kaiser M. Creative Destruction: A Basic Computational Model of  
635 Cortical Layer Formation. *Cerebral Cortex.* 2021 Jun 10;31(7):3237–53.



- 636 33. Keeley PW, Eglén SJ, Reese BE. From random to regular: Variation in the patterning of  
637 retinal mosaics\*. *J Comp Neurol.* 2020 Sep;528(13):2135–60.
- 638 34. Amini R, Rocha-Martins M, Norden C. Neuronal Migration and Lamination in the  
639 Vertebrate Retina. *Front Neurosci.* 2017;11:742.
- 640 35. Breitwieser L, Hesam A, de Montigny J, Vavourakis V, Iosif A, Jennings J, et al.  
641 BioDynaMo: a modular platform for high-performance agent-based simulation. Wren J,  
642 editor. *Bioinformatics.* 2021 Sep 16;btab649.
- 643 36. Cook JE. Spatial properties of retinal mosaics: An empirical evaluation of some existing  
644 measures. *Vis Neurosci.* 1996 Jan;13(1):15–30.
- 645
